# Supplementary material for: The Development of Cell-Penetrating Peptides for Efficient and Selective In Vivo Expression of mRNA in Spleen Tissue
Source: MDPI journal article supplement (doi:10.3390/pharmaceutics15030952), 2023-03-15
Supplement: s1 [file s1]

CATTTGCCACCCGGCTTCAACGAGTACGACTTCGTGCCCCGAGAGCTTCGACCGGGACAAAACCATCGCCCTGATCATGAACAGTAGTGGCAGTACCGGATTGCCCAAGGGCGTAGCCCTACC  
GCACCGCACCCTTGTGTCCGATTCACTCATGCCCCGACCCCATCTTCGGCAACCAGATCATCCCCGACACCGCTATCCTCAGCGTGGTGCCATTTACCACGGCTTCGGCATGTTACCCACG  
CTGGGCTACTTGATCTGCGGCTTTCGGGTCGTGCTCATGTACCGCTTCGAGGAGGAGCTATTCTTGCGCAGCTTGCAAGACTATAAGATTCAATCTGCCCTGCTGGTGCCACACTATTTAGCT  
TCTTCGCTAAGAGCACTCTCATCGACAAGTACGACCTAAGCAACTTGCACGAGATCGCCAGCGGGCGGGCGCCGCTCAGCAAGGAGGTAGGTGAGGCCGTGGCCAAACGCTTCACCTACC  
AGGCATCCGCCAGGGCTACGGCCTGACAGAAACAACAGCGCCATTCTGATACCCCCGAAGGGGACGACAAGCTGGCGCAGTAGGCAAGGTGGTGCCCTTCTTCGAGGCTAAGGTGGT  
GGACTTGACACCGGTAAGACACTGGGTGTGAACCAGCGCGGCGAGCTGTGCGTCCGTGGCCCCATGATCATGAGCGGCTACGTTAACAACCCCGAGGCTACAAACGCTCTCATCGACAAG  
GACGGCTGGCTGCACAGCGGCGACATCGCCTACTGGGACGAGGACGAGCACTTCTTCATCGTGGACCGGCTGAAGAGCCTGATCAAATACAAGGGCTACCAGGTAGCCCCAGCCGAACCTGG  
AGAGCATCCTGCTGCAACACCCCAACATCTTCGACGCCGGGGTTCGCCGGCCTGCCGACGACGATGCCGGCGAGCTGCCCGCCGAGTCGTCGTGCTGGAACACGGTAAACCATGACCGA  
GAAGGAGATCGTGGACTATGTGGCCAGCCAGGTTACAACCGCCAAGAAGCTGCGCGGTGGTGTGTGTTCTGTTGACGAGGTGCCTAAAGGACTGACCGGCAAGTTGGACGCCCCGCAAGAT  
CCGCGAGATTCTCATTAAAGGCCAAGAAGGGCGGCAAGATCGCCGTGTAACCGCGGTACCAGGTCGACAAGGTGAGTTGGGGACCCCTGATTGTTCTTTCTTTTCGCTATTGTAAAATTCAT  
GTTATATGGAGGGGGCAAAGTTTTAGGGTGTGTTTAGAATGGGAAGATGTCCCTGTATCACCATGGACCCTCATGATAATTTGTTCTTTCACTTTCTACTCTGTTGACAACCATGTCTC  
CTCTATTTTTCTTTTCACTTTCTGTAACTTTTCTGTTAACTTTAGCTTGCATTTGTAACGAATTTTAAATTCACCTTTGTTATTTGTGAGATTGTAAGTACTTTCTAATCACTTTTTTTCAAGG  
CAATCAGGGTATATTATATTGTACTTCAGCACAGTTTTAGAGAACAAATTGTTATAATTAATGATAAGGTAGAATATTTCTGCATATAAATTCGGCTGGCGTGGAATATTCTTATTGGTAGA  
AACAACCTACACCTGGTCATCATCCTGCCTTTCTCTTTATGTTTACAATGATATACACTGTTTGAGATGAGGATAAAAATACTCTGAGTCCAAACCGGGCCCCCTCTGCTAACCATGTTTCATGCCTT  
CTTCTTTTCTACAGGCTCGACGGAGATGGGGGAGGCTAACTGAAACACGGAAGGAGACAATACCGGAAGGAACCCGCGCTATGACGGCAATAAAAGACAGAATAAAACGCACGGGTG  
TTGGGTCGTTTGTTCATAAACCGGGGTTTCGGTCCAGGGCTGGCACTCTGTCGATACCCACCGAGACCCATTGGGGCCAATACGCCCCGCTTTCTCTTTTCCCCACCCACCCCAAG  
TTCGGGTGAAGGCCAGGGCTCGCAGCCAACGTGGGGCGGCAGGCCCTGCCATAGCCACTGGCCCCGTGGGTAGGGACGGGGTCCCCATGGGGAATGGTTATGTTTCGTGGGGGTTA  
TTATTTTGGGCGTTGCGTGGGGTCTGGGTATACCCTCGACCTGCAGGGTACCAGATCTGCTAGCTAGTCTTTCCGATCGATGGAAGGATCCGTGCGAGCTCTACCTTGGCGCCGCGACATGAT  
AAGATACATTGATGAGTTTGGACAAACCACAACCTAGAATGCAGTGAAAAAATGCTTTATTTGTGAAATTTGTGATGCTATTGCTTTATTTGTGAAATTTGTGATGCTATTGCTTTATTTGTAAC  
CATTATAAGCTGCAATAAACAAGTTAACAACAACAATTGCATTCATTTATGTTTCAGGTTTCAGGGGGAGGTGTGGGAGGTTTTTAAAGCAAGTAAACCTCTACAAATGTGGTAGATCATT  
TATCTCTAGAGTCGACCATGGGGGCCGCCCACTGGGGTAACCTTTGAGTTCTCTCAGTTGGGGTAATCAGCATCATGATGTGGTACCACATCATGATGCTGATTATAAGAATGCGGCC  
GCCCACTCTAGTGATCTCGAGTTAATAATTCAGAAGAACTCGTCAAGAAGGCGATAGAAGGCGATGCGCTGCGAATCGGGAGCGGCGATACCGTAAAGCACGAGGAAGCGGTCAGCCC  
ATTCGCCGCCAAGCTCTTCAGCAATATCACGGGTAGCCAACGCTATGTCCTGATAGCGGTCCGCCACACCCAGCCGGCCACAGTCGATGAATCCAGAAAAGCGGCCATTTTCCACCATGATAT  
TCGGCAAGCAGGCATCGCCATGGGTACGACGAGATCCTCGCCGTGGGCATGCTCGCCTTGAGCCTGGCGAACAGTTGGCTGGCGCGAGCCCCCTGATGCTCTTCGTCCAGATCATCCTGA  
TCGACAAGACCGGCTTCATCCGAGTACGTGCTCGCTCGATGCGATGTTTCGCTTGGTGGTCAATGGGCAGGTAGCCGATCAAGCGTATGCAGCCGCCGATTGCATCAGCCATGATGGA  
TACTTTCTCGGCAGGAGCAAGGTGTAGATGACATGGAGATCCTGCCCCGGCACTTCGCCAATAGCAGCCAGTCCCTTCCCGCTTCAGTGACAACGTCGAGCACAGCTGCGCAAGGAACGCC  
CGTCGTGGCCAGCCACGATAGCCGCGCTGCCTCGTCTTGCAAGTTCAATCAGGGCACCGGACAGGTCGGTCTTGACAAAAAGAACCGGGCGCCCCCTGCGCTGACAGCCGGAACACGGCGGCA  
TCAGAGCAGCCGATTGTCTGTTGTGCCAGTCATAGCCGAATAGCCTCTCCACCCAAGCGGCCGAGAACCTGCGTGCAATCCATCTTGTTCAATCATGCGAAACGATCCTCATCTGTCTCTT  
GATCAGAGCTTGATCCCCTGCGCCATCAGATCCTTGCGGCGGAGAAAGCCATCCAGTTTACTTTGCAGGGCTTCCCAACCTTACCAGAGGGCGCCCCAGCTGGCAATCCGGTTTCGCTTGCTG  
TCCATAAAACCGCCAGTCTAGCTATCGCCATGTAAGCCCACTGCAAGCTACCTGCTTTCTTTGCGCTTGCGTTTTCCCTTGTCAGATAGCCAGTAGCTGACATTCATCCGGGGTCAGCAC  
CGTTTCTGCGGACTGGCTTTCTACGTGCTCGAGGGGGGCCAAACGGTCTCCAGCTTGGCTGTTTGGCGGATGAGAGAAGATTTTCAGCCTGATACAGATTAAATCAGAACGCAGAAGCGGT  
CTGATAAAACAGAATTTGCTGCGGCGAGTAGCGCGGTGGTCCACCTGACCCCATGCCAACTCAGAAGTGAAACGCCGTAGCGCCGATGGTAGTGTGGGGTCTCCCCATGCGAGAGTAG  
GGAACGCCAGGCATCAAATAAAACGAAAGGCTCAGTCGAAAGACTGGGCCTTTCTGTTTTATCTGTTGTTTGTGCGGTGAACGCTCTCCTGAGTAGGACAAATCCGCCGGGAGCGGATTTGAA  
CGTTGCGAAGCAACGGCCCGGAGGGTGGCGGGCAGGACGCCCCGCATAAACTGCCAGGCATCAAATTAAGCAGAAGGCCATCCTGACGGATGGCCTTTTTGCGTTTCTACAAACTCTTTGT  
TTATTTTTCTAAATACATTCAAATATGTATCCGCTCATGACCAAAATCCCTTAACGTGAGTTTTGTTTCCACTGAGCGTCAGACCCCGTAGAAAAGATCAAAGGATCTTCTTGAGATCCTTTTTT  
CTGCGCGTAATCTGCTGCTTGCAAAACAAAAAACCCGCTACCAGCGGTGGTTTGTGGCGGATCAAGAGCTACCAACTCTTTTCCGAAGGTAAGTGGCTTCAGCAGAGCGCAGATACCA  
AATACTGTCCTTCTAGTGAGCCGATGTTAGGCCACCACTTCAAGAACTCTGTAGCACCGCTACATACCTCGCTCTGCTAATCCTGTTACCAAGTGGCTGCTGCCAGTGGCGATAAGTCGTGTC  
TTACCGGGTTGGAATCAAGACGATAGTTACCGGATAAGGCGCAGCGGTGGGGTGAACGGGGGGTTCGTGCACACAGCCAGCTTGGAGCGAACGACCTACACCGAACTGAGATACCTACA

GCGTGAGCTATGAGAAAGCGCCACGCTTCCCGAAGGGAGAAAGGCGGACAGGTATCCGGTAAGCGGCAGGGTCGGAACAGGAGAGCGCACGAGGGAGCTTCCAGGGGAAACGCCTGG  
 TATCTTTATAGTCTGTCGGGTTTCGCCACCTCTGACTTGAGCGTCGATTTTTGTGATGCTCGTCAGGGGGGCGGAGCCTATGGAAAAACGCCAGCAACGCGGCCTTTTACGGTTCCTGGCCT  
 TTTGCTGGCCTTTTGTCTACATGTTCTTTCTCGCTTATCCCCTGATTCTGTGGATAACCGTATTACCGCCTTTGAGTGAGCTGATACCGCTCGCCGAGCCGAACGACCGAGCGCAGCGAGTC  
 AGTGAGCGAGGAAGCGGAAGAGCGCCTGATGCGGTATTTCTCCTTACGCATCTGTGCGGTATTTACACCGCATATGGTGCCTCTCAGTACAATCTGCTCTGATGCCGCATAGTTAAGCCA  
 GTATACACTCCGCTATCGCTACGTGACTGGGTATGGTGTGCGCCCCGACACCCGCCAACACCCGCTGACGCGCCCTGACGGGCTTGCTGCTCCCGGCATCCGCTTACAGACAAGCTGTGACC  
 GTCTCCGGGAGCTGCATGTGTGAGAGTTTTACCGTCATCACCGAAACGCGCGAGGCAGCAGATCAATTCGCGCGCGAAGGCGAAGCGGCATGCATAATGTGCCTGTCAAATGGACGAAG  
 CAGGGATTCTGCAAACCTATGCTACTCCGTCAAGCCGTCAATTGTCTGATTCTGTACCAATTATGACAACCTGACGGCTACATCATTCACTTTTTCTTACAACCGGCACGGAACCTCGCTCGGG  
 CTGGCCCCGGTGCATTTTTTAAATACCCGCGAGAAATAGAGTTGATCGTCAAAACCAACATTGCGACCGACGGTGGCGATAGGCATCCGGGTGGTGCTCAAAGCAGCTTCGCTGGCTGAT  
 ACGTTGGTCTCGCGCCAGCTTAAGACGCTAATCCCTAACTGCTGGCGGAAAAGATGTGACAGACGCGACGGCGACAAGCAAACATGCTGTGCGACGCTGGCGAT

**Supplementary Table S2.** Reagents and antibodies used for flow cytometry.

| Antigen               | Clone    | Fluorophore        | Dilution Used for Staining | Source                   |
|-----------------------|----------|--------------------|----------------------------|--------------------------|
| Fixable Viability Dye |          | eFluor™ 506        | 1:800                      | Thermo Fisher Scientific |
| Cd45                  | 30-F11   | AlexaFluor700      | 1:400                      | Biolegend                |
| Cd11b                 | M1/70    | PE-Dazzle          | 1:800                      | Biolegend                |
| Cd11c                 | N418     | APC-Cy7            | 1:400                      | Biolegend                |
| Cd19                  | 1D3/CD19 | PerCP-Cy5.5        | 1:200                      | Biolegend                |
| Cd8                   | 53-5.8   | BrilliantViolet650 | 1:200                      | Biolegend                |
| Cd4                   | RM4-5    | BrilliantViolet570 | 1:400                      | Biolegend                |
| F4/80                 | BM8      | PE-Cy7             | 1:400                      | Biolegend                |

**Supplementary Table S3.** Size distribution and zeta-potentials of CPP/mRNA and CPP/pDNA nanoparticles formed at CPP/NA charge ratio 3:1.

| CPP   | Size distribution |             |          | Zeta-potential |             |             |
|-------|-------------------|-------------|----------|----------------|-------------|-------------|
|       | mRNA, CR3         | pDNA, CR3   |          | mRNA, CR3      | pDNA, CR3   |             |
|       | Size, nm          | pDI         | Size, nm | pDI            |             |             |
| PF14  | 166 ± 11          | 0.34 ± 0.03 | 188 ± 8  | 0.21 ± 0.01    | 46.4 ± 0.49 | 36.7 ± 0.36 |
| NF71  | 165 ± 14          | 0.35 ± 0.06 | 134 ± 2  | 0.29 ± 0.02    | 37.0 ± 0.25 | 37.4 ± 0.63 |
| NF55  | 186 ± 10          | 0.24 ± 0.01 | 163 ± 2  | 0.30 ± 0.05    | 33.6 ± 0.01 | 38.2 ± 1.01 |
| NF430 | 167 ± 2           | 0.22 ± 0.01 | 143 ± 2  | 0.16 ± 0.01    | 35.5 ± 0.71 | 46.8 ± 1.45 |
| NF424 | 172 ± 13          | 0.31 ± 0.02 | 138 ± 6  | 0.14 ± 0.03    | 34.6 ± 0.32 | 42.1 ± 1.13 |
| NF436 | 177 ± 5           | 0.35 ± 0.02 | 140 ± 1  | 0.18 ± 0.01    | 33.8 ± 0.47 | 35.8 ± 0.65 |

## Supplementary Figures:

MALDI and UPLC data of CPPs used in this work.

### PF14

UPLC retention time: 12 min 50 s

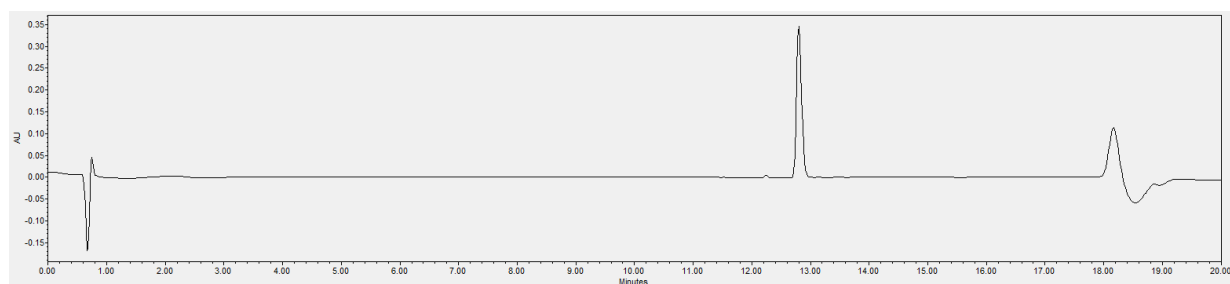

MALDI main peak 2405 m/z

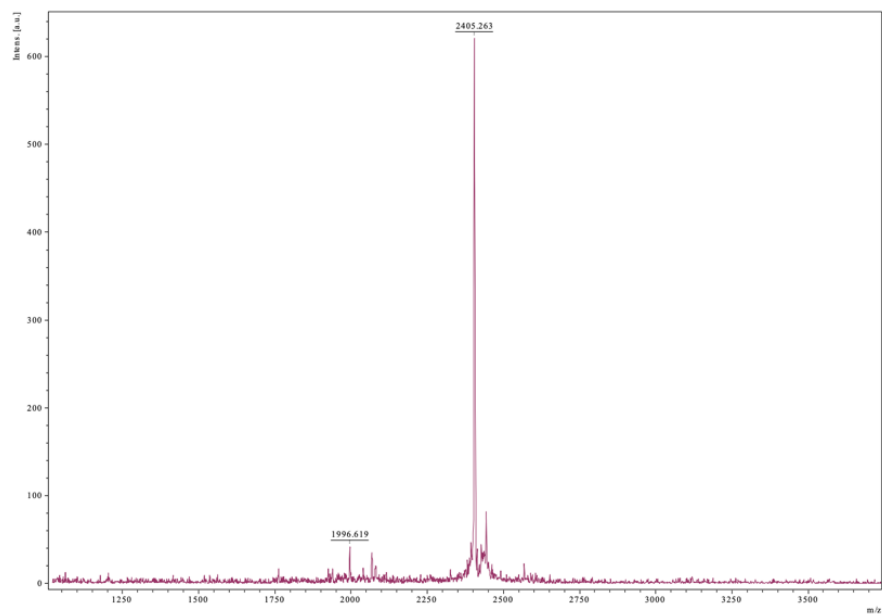

NF55

UPLC retention time 13 min 12 s

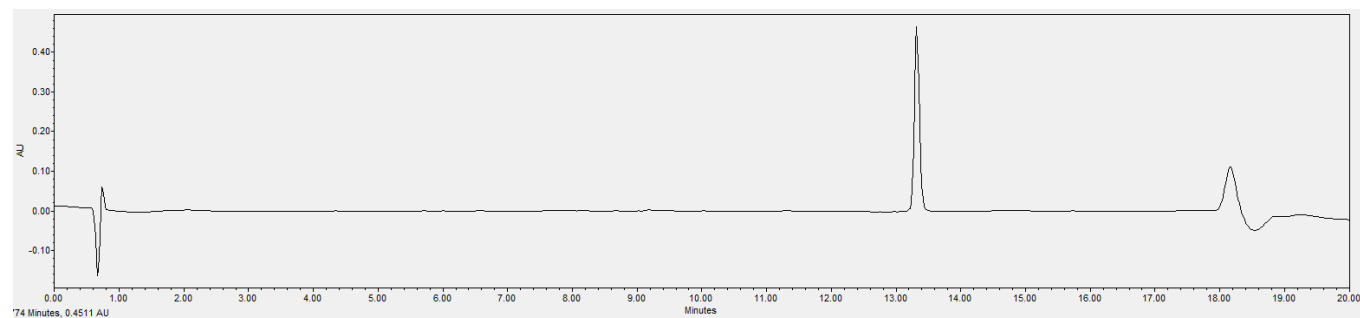

MALDI main peak 2376 m/z

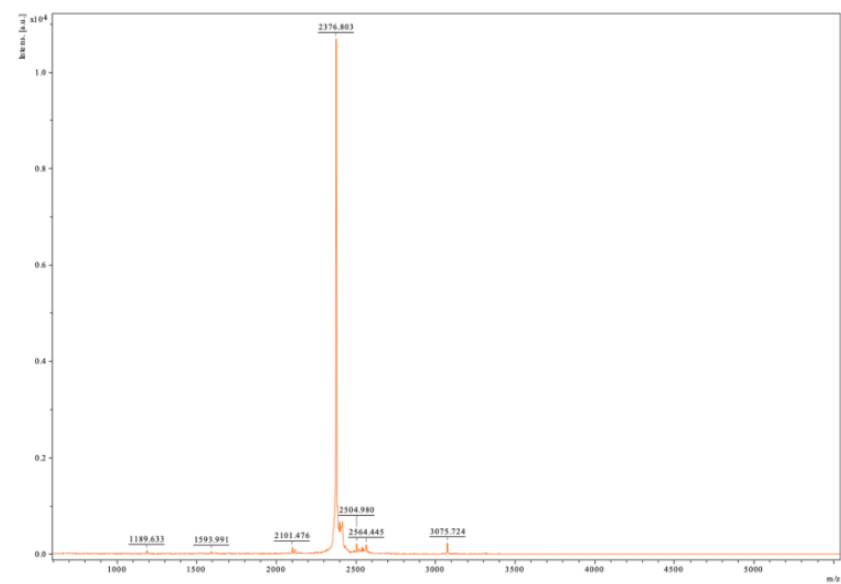

**NF71**

UPLC retention time 9 min 36 s

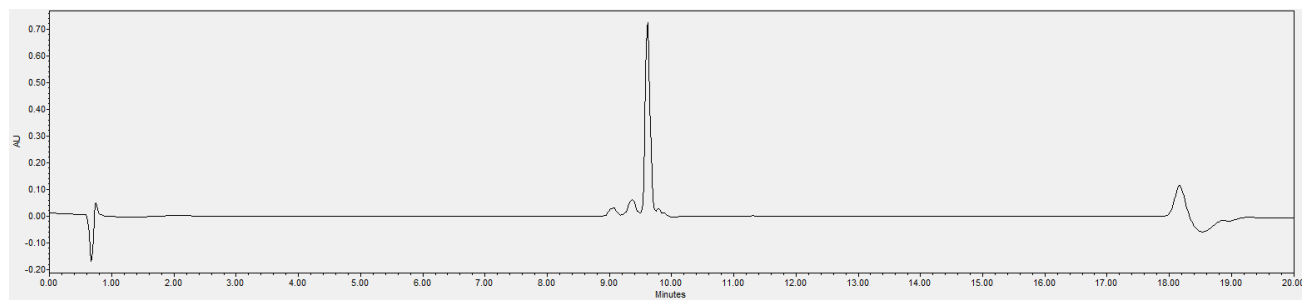

MALDI main peak 2627 m/z

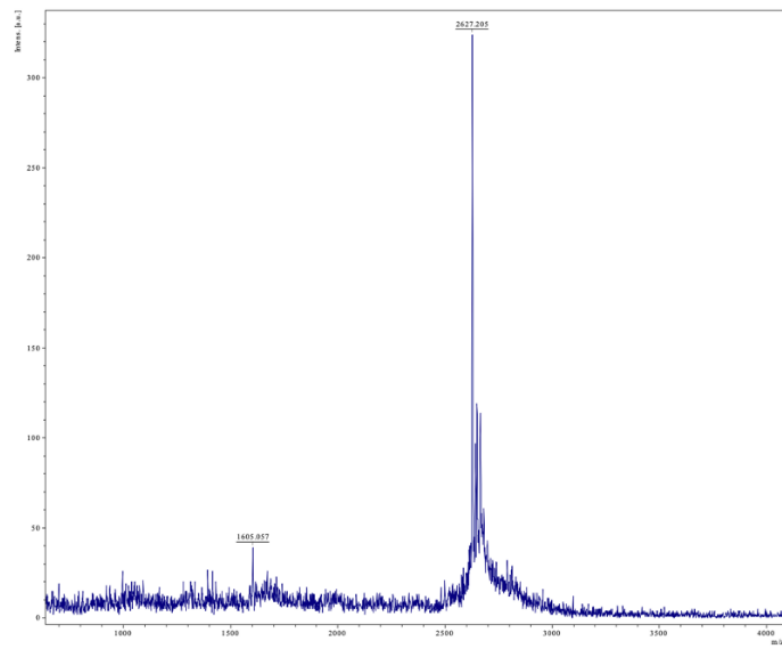

**NF430**

UPLC retention time 13 min 6 s

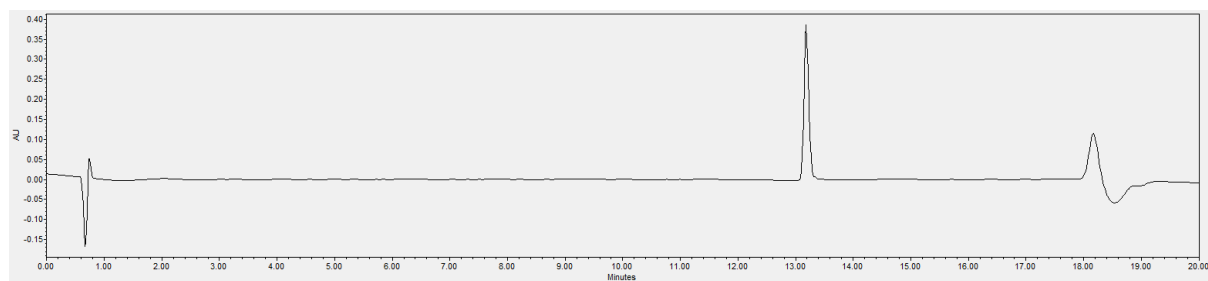

MALDI main peak 2149 m/z

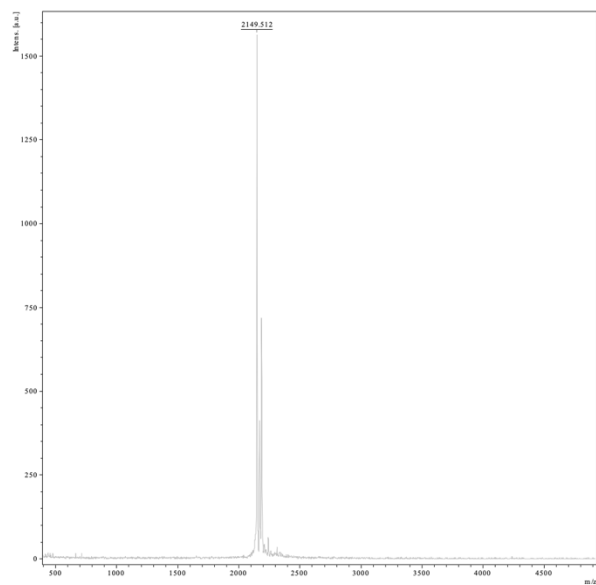

**NF424**

UPLC retention time 13 min

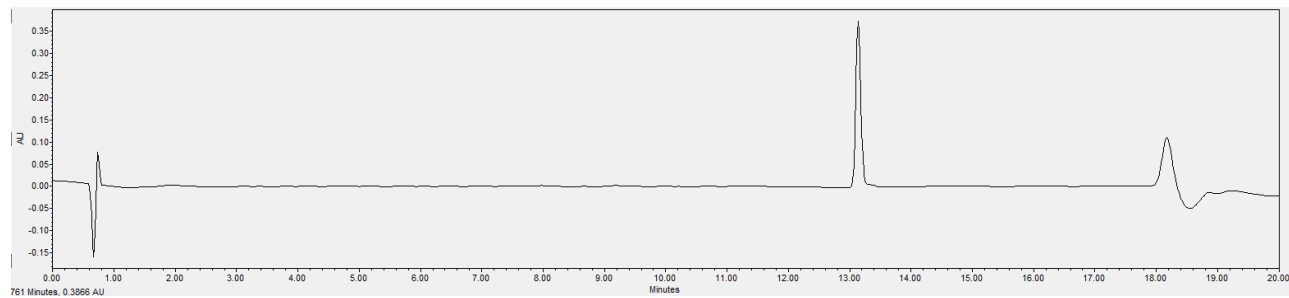

MALDI main peak 2136 m/z

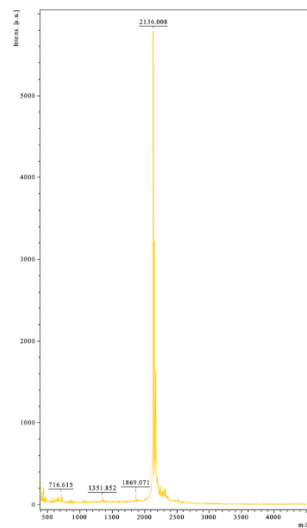



**NF436**

UPLC retention time 12 min 55 s

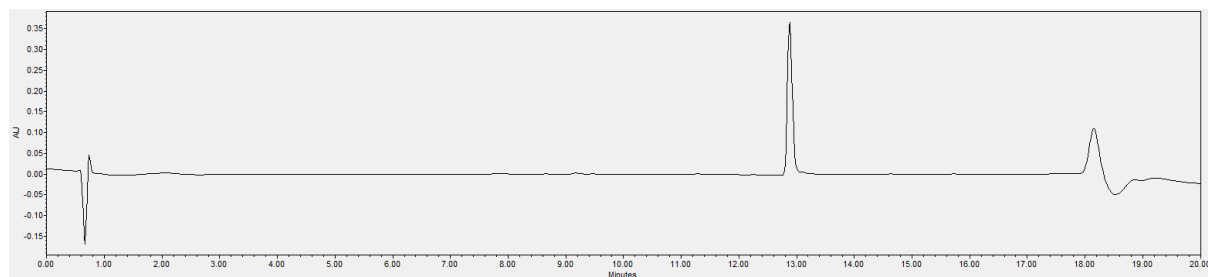

MALDI main peak 2137 m/z

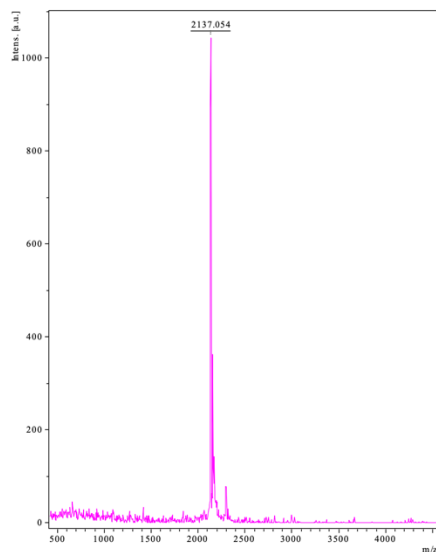

**Figure S1.** HPLC and MS for used peptides. Peptides were analyzed with reverse-phase ultra-performance liquid chromatography (ACQUITY UPLC H-class (Waters, USA)) accompanied with Empower software and equipped with C18 column (ACQUITY UPLC® BEH130 C18, 1.7  $\mu$ m, 100  $\times$  2.1 mm) used with temperature set to 40°C. The gradient was set from 5 – 95 % acetonitrile/water supplemented with 0.1% TFA, over a period of 13 min. The molecular weight of the peptides was determined by matrix-assisted laser desorption-ionization/time of flight mass spectrometry (Bruker Microflex LT/SH, USA).

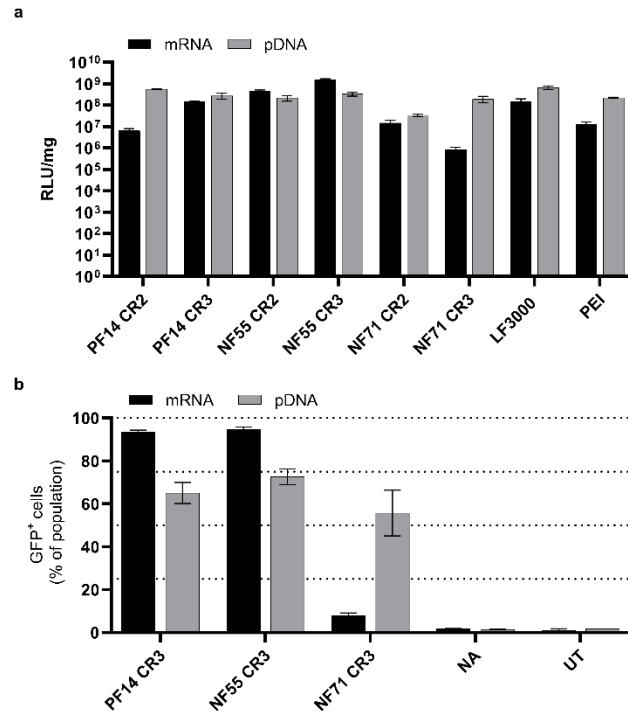

**Figure S2.** Total reporter levels and transfected cell population in vitro. All CPPs achieve high expression levels with both pDNA and mRNA in CHO-K1 cells. a) Transfection efficacy based on total reporter levels 24 h post-transfection from whole cell lysate. As commercially available transfection reagents Lipofectamine 3000 (LF3000) and PEI-Max (PEI) were used. PEI/NA complexes were formed at N/P ratio 20. Transfection with 0.1  $\mu$ g of nucleic acid per 96-well plate well in 100  $\mu$ l of serum (10% FBS) containing media. 24 h post-transfection cells were lysed, and from cell lysate relative luminescence (RLU) were detected after addition of substrate. RLU values are normalized to total protein in the whole cell lysate b) transfected cell population percentage determined with flow cytometry. CHO-K1 cells were transfected with 0.5  $\mu$ g of NA per 24-well plate well and in 500  $\mu$ l of serum containing media. 4 h post-transfection media was replaced with fresh media and cells were further incubated for 20 h. 24 h post-transfection cells were detached and analyzed with flow cytometer to detect fluorescent positive cell population (GFP+) out of live cells. For threshold setting untreated cells were used.

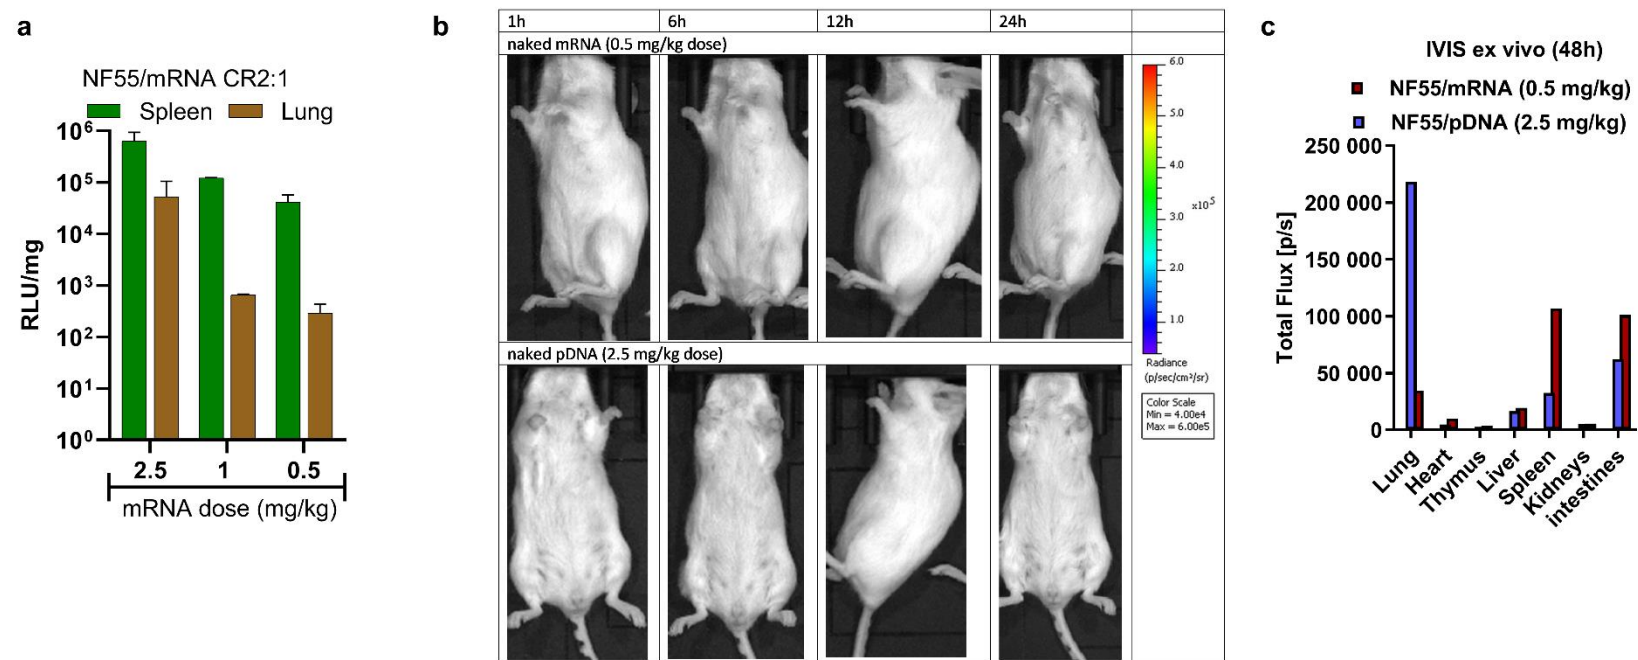

**Figure S3. In vivo screening of NF55/mRNA and controls groups for imaging.** mRNA dose reduction in NF55/mRNA complexes results in reduction of expression in the lungs whereas in the spleen the reporter levels remain relatively high even with the lower dose. Tissues were harvested 24 h post-injection of NF55/mRNA complexes. 2.5 mg/kg, 1 mg/kg and 0.5 mg/kg doses of mRNA in the complex were compared. b) Representative images from whole body imaging with equalized radiance scales shown in Figure 1e. Mice treated with 0.5 mg/kg of luciferase encoding mRNA or 2.5 mg/kg luciferase encoding pDNA. Images taken at 1h, 6h, 12h and 24h post-administration. c) Ex vivo imaging of tissues collected 48 h post injection.

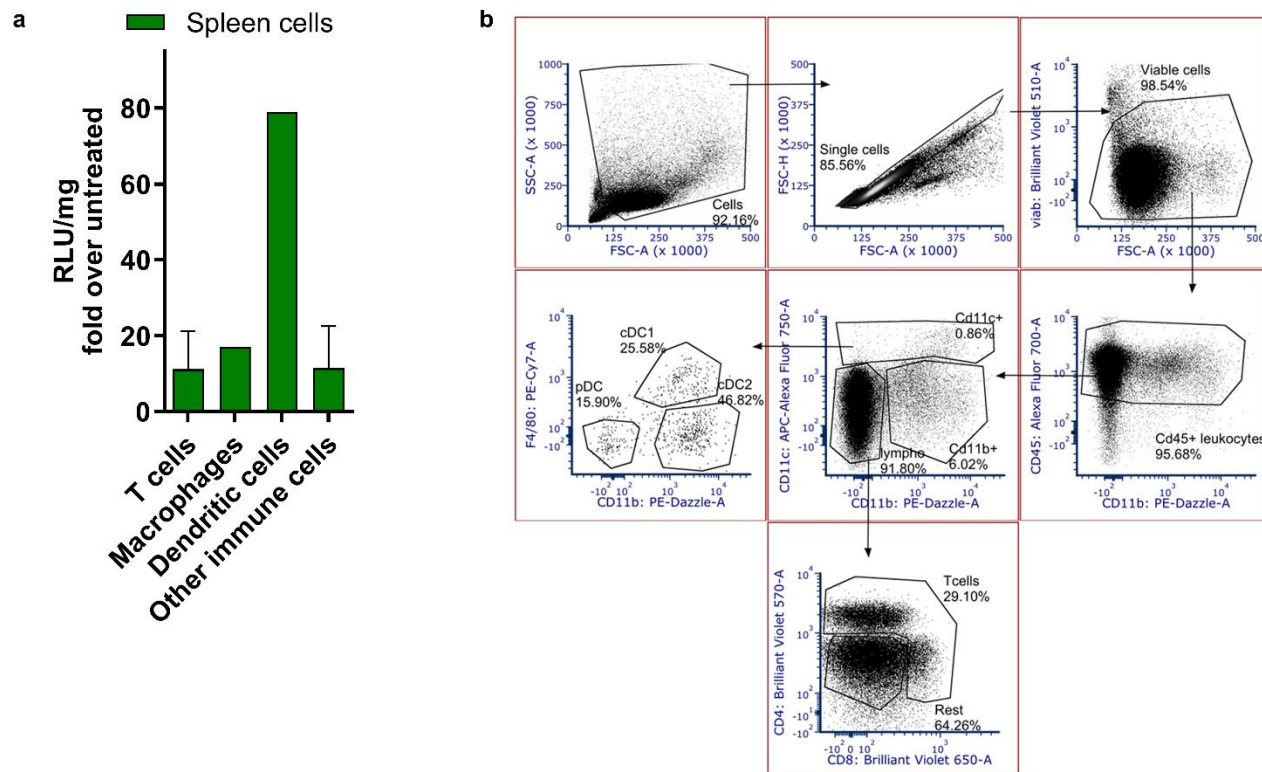

**Figure S4.** Gating strategy for sorting cells from spleen tissue from NF55/mRNA treated mice and reporter levels detected from different steps of sorting and from sorted cells. Spleen harvested 24 h post-administration of complexes via single i.v. injection. a) Detected reporter levels after single administration of NF55/mRNA. Samples were collected and lysed to detect expressed luciferase levels in the sorted cell lysate.

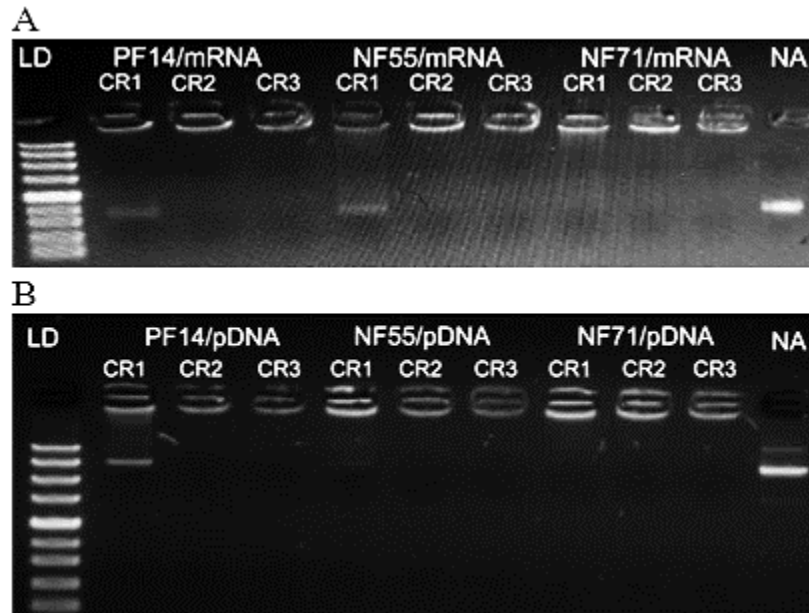

Ladder ZipRuler2:

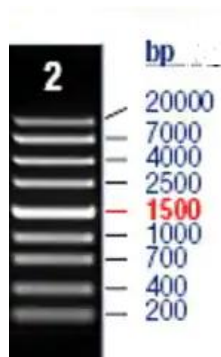

**Figure S5.** A) CPPs are efficiently able to interact with mRNA and limit its migration in 1% agarose gel. CPP/mRNA complexes were formed at charge ratios (CR) 1:1; 2:1 and 3:1 with CPP in excess. After incubation samples were diluted, loading dye was added and samples transferred to agarose gel tooth. LD – ladder ZipRuler 2. NA – free mRNA at the same concentration as used in the CPP/NA complexes. B) CPPs are efficiently able to interact with pDNA and limit its migration in agarose gel. CPP/pDNA complexes were formed at charge ratios (CR) 1:1; 2:1 and 3:1 with CPP in excess. After incubation samples were diluted, loading dye was added and samples transferred to agarose gel tooth. LD – ladder ZipRuler 2. NA – free pDNA at the same concentration as used in the CPP/NA complexes.

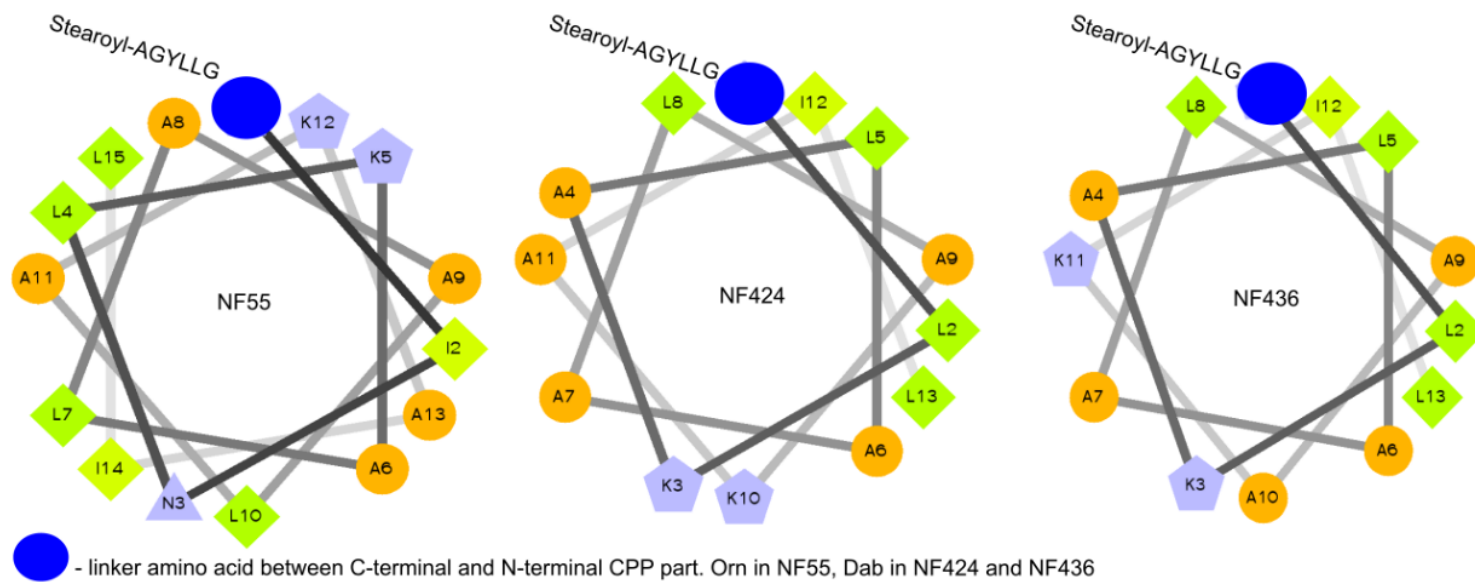

**Figure S6.** Helical wheel projections of NF55, NF424, NF436 C-terminal part from the linker amino acid. Projections are modified from the calculations done in: <http://rzlab.ucr.edu/scripts/wheel/wheel.cgi>.

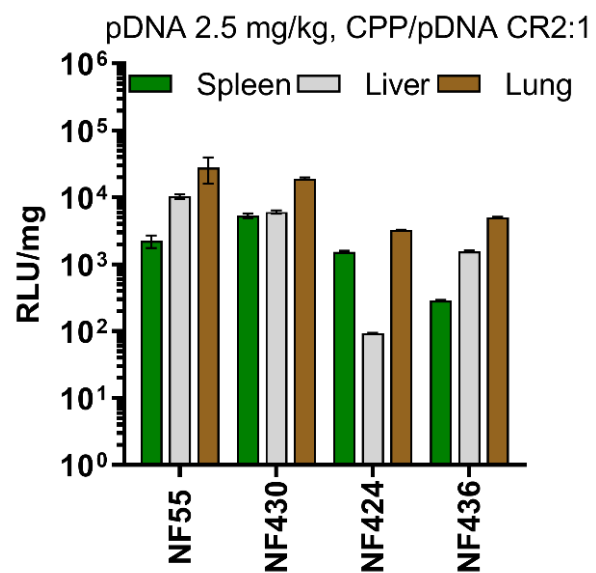

**Figure S7.** The in vivo efficacy of CPP/pDNA complexes formed with new CPPs. CPP/pDNA complexes were formed at charge ratio (CR) 2:1 with CPP in excess. The reporter levels from delivered luciferase encoding pDNA was detected from tissue homogenate 16 h post-injection.

## Statistical Analysis

Fig1A

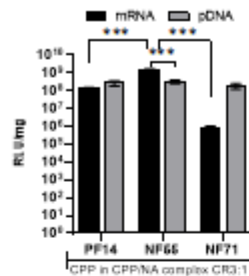

### 2-way ANOVA

| Effect           | Univariate Tests of Significance, Effect Sizes, and Powers for Transfection in Cells (Fig1A statistics) |                  |              |          |          |                     |
|------------------|---------------------------------------------------------------------------------------------------------|------------------|--------------|----------|----------|---------------------|
|                  | Sigma-restricted parameterization<br>Effective hypothesis decomposition                                 |                  |              |          |          |                     |
|                  | SS                                                                                                      | Degr. of Freedom | MS           | F        | p        | Partial eta-squared |
| Intercept        | 1.750005E+19                                                                                            | 1                | 1.750005E+19 | 38.61421 | 0.000000 | 0.233158            |
| CPP              | 1.870530E+19                                                                                            | 2                | 9.352649E+18 | 20.63681 | 0.000000 | 0.245277            |
| Nucleic Acid     | 2.214110E+18                                                                                            | 1                | 2.214110E+18 | 4.88548  | 0.028875 | 0.037043            |
| CPP*Nucleic Acid | 1.431876E+19                                                                                            | 2                | 7.159382E+18 | 15.79732 | 0.000001 | 0.199216            |
| Error            | 5.755669E+19                                                                                            | 127              | 4.532023E+17 |          |          |                     |

### Post-hoc Tukey tests

| Cell No. | Tukey HSD test; variable Transfection in Cells (Fig1A)<br>Approximate Probabilities for Post Hoc Tests<br>Error: Between MS = 453E15, df = 127.00 |              |               |               |               |               |               |               |
|----------|---------------------------------------------------------------------------------------------------------------------------------------------------|--------------|---------------|---------------|---------------|---------------|---------------|---------------|
|          | CPP                                                                                                                                               | Nucleic Acid | {1}<br>1427E5 | {2}<br>2766E5 | {3}<br>1542E6 | {4}<br>3317E5 | {5}<br>8491E2 | {6}<br>1929E5 |
| 1        | PF14                                                                                                                                              | mRNA         |               | 0.994908      | 0.000020      | 0.972206      | 0.997128      | 0.999967      |
| 2        | PF14                                                                                                                                              | pDNA         | 0.994908      |               | 0.000020      | 0.999651      | 0.883714      | 0.998653      |
| 3        | NF55                                                                                                                                              | mRNA         | 0.000020      | 0.000020      |               | 0.000020      | 0.000020      | 0.000020      |
| 4        | NF55                                                                                                                                              | pDNA         | 0.972206      | 0.999651      | 0.000020      |               | 0.756018      | 0.982465      |
| 5        | NF71                                                                                                                                              | mRNA         | 0.997128      | 0.883714      | 0.000020      | 0.756018      |               | 0.979161      |
| 6        | NF71                                                                                                                                              | pDNA         | 0.999967      | 0.998653      | 0.000020      | 0.982465      | 0.979161      |               |



Fig1B

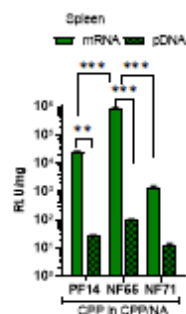

## 2-way ANOVA

| Effect           | Univariate Tests of Significance, Effect Sizes, and Powers for Expression in Spleen (Fig1B)<br>Sigma-restricted parameterization<br>Effective hypothesis decomposition |                  |              |          |      |                     |
|------------------|------------------------------------------------------------------------------------------------------------------------------------------------------------------------|------------------|--------------|----------|------|---------------------|
|                  | SS                                                                                                                                                                     | Degr. of Freedom | MS           | F        | p    | Partial eta-squared |
| Intercept        | 2.834192E+11                                                                                                                                                           | 1                | 2.834192E+11 | 8843.910 | 0.00 | 0.998194            |
| CPP              | 7.887965E+11                                                                                                                                                           | 3                | 2.629322E+11 | 8204.626 | 0.00 | 0.999350            |
| Nucleic Acid     | 2.832424E+11                                                                                                                                                           | 1                | 2.832424E+11 | 8838.393 | 0.00 | 0.998193            |
| CPP*Nucleic Acid | 7.884898E+11                                                                                                                                                           | 3                | 2.628299E+11 | 8201.435 | 0.00 | 0.999350            |
| Error            | 5.127491E+08                                                                                                                                                           | 16               | 3.204682E+07 |          |      |                     |

## Post-hoc Tukey tests

| Cell No. | Tukey HSD test; variable Expression in Spleen (Fig1B)<br>Approximate Probabilities for Post Hoc Tests<br>Error: Between MS = 3205E4, df = 16.000 |              |               |               |               |               |               |               |               |               |
|----------|--------------------------------------------------------------------------------------------------------------------------------------------------|--------------|---------------|---------------|---------------|---------------|---------------|---------------|---------------|---------------|
|          | CPP                                                                                                                                              | Nucleic Acid | {1}<br>24224. | {2}<br>27.210 | {3}<br>8963E2 | {4}<br>100.40 | {5}<br>1393.6 | {6}<br>11.659 | {7}<br>11.221 | {8}<br>4.5525 |
| 1        | PF14                                                                                                                                             | mRNA         |               | 0.003         | 0.000         | 0.003         | 0.017         | 0.003         | 0.011         | 0.003         |
| 2        | PF14                                                                                                                                             | pDNA         | 0.003         |               | 0.000         | 1.000         | 1.000         | 1.000         | 1.000         | 1.000         |
| 3        | NF55                                                                                                                                             | mRNA         | 0.000         | 0.000         |               | 0.000         | 0.000         | 0.000         | 0.000         | 0.000         |
| 4        | NF55                                                                                                                                             | pDNA         | 0.003         | 1.000         | 0.000         |               | 1.000         | 1.000         | 1.000         | 1.000         |
| 5        | NF71                                                                                                                                             | mRNA         | 0.017         | 1.000         | 0.000         | 1.000         |               | 1.000         | 1.000         | 1.000         |
| 6        | NF71                                                                                                                                             | pDNA         | 0.003         | 1.000         | 0.000         | 1.000         | 1.000         |               | 1.000         | 1.000         |
| 7        | NA                                                                                                                                               | mRNA         | 0.011         | 1.000         | 0.000         | 1.000         | 1.000         | 1.000         |               | 1.000         |
| 8        | NA                                                                                                                                               | pDNA         | 0.003         | 1.000         | 0.000         | 1.000         | 1.000         | 1.000         | 1.000         |               |

Fig2E

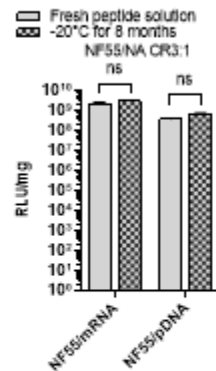

## 2-way ANOVA

| Effect                   | Univariate Tests of Significance for Transfection in Cells (Fig2E)<br>Sigma-restricted parameterization<br>Effective hypothesis decomposition |                  |              |          |          |
|--------------------------|-----------------------------------------------------------------------------------------------------------------------------------------------|------------------|--------------|----------|----------|
|                          | SS                                                                                                                                            | Degr. of Freedom | MS           | F        | p        |
| Intercept                | 9.999625E+19                                                                                                                                  | 1                | 9.999625E+19 | 144.1409 | 0.000000 |
| CPP storage              | 3.581624E+18                                                                                                                                  | 1                | 3.581624E+18 | 5.1628   | 0.029328 |
| Nucleic acid             | 4.414400E+19                                                                                                                                  | 1                | 4.414400E+19 | 63.6319  | 0.000000 |
| CPP storage*Nucleic acid | 8.377574E+17                                                                                                                                  | 1                | 8.377574E+17 | 1.2076   | 0.279311 |
| Error                    | 2.428089E+19                                                                                                                                  | 35               | 6.937398E+17 |          |          |

## Post-hoc Tukey tests

| Effect                   | Univariate Tests of Significance for Transfection in Cells (Fig2E)<br>Sigma-restricted parameterization<br>Effective hypothesis decomposition |                  |              |          |          |
|--------------------------|-----------------------------------------------------------------------------------------------------------------------------------------------|------------------|--------------|----------|----------|
|                          | SS                                                                                                                                            | Degr. of Freedom | MS           | F        | p        |
| Intercept                | 9.999625E+19                                                                                                                                  | 1                | 9.999625E+19 | 144.1409 | 0.000000 |
| CPP storage              | 3.581624E+18                                                                                                                                  | 1                | 3.581624E+18 | 5.1628   | 0.029328 |
| Nucleic acid             | 4.414400E+19                                                                                                                                  | 1                | 4.414400E+19 | 63.6319  | 0.000000 |
| CPP storage*Nucleic acid | 8.377574E+17                                                                                                                                  | 1                | 8.377574E+17 | 1.2076   | 0.279311 |
| Error                    | 2.428089E+19                                                                                                                                  | 35               | 6.937398E+17 |          |          |

Fig2F

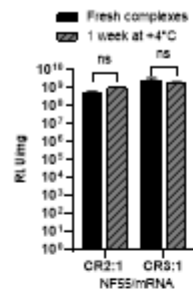

## 2-way ANOVA

| Effect         | Univariate Tests of Significance for Transfection in Cells (Fig2F)<br>Sigma-restricted parameterization<br>Effective hypothesis decomposition |                  |              |          |          |
|----------------|-----------------------------------------------------------------------------------------------------------------------------------------------|------------------|--------------|----------|----------|
|                | SS                                                                                                                                            | Degr. of Freedom | MS           | F        | p        |
| Intercept      | 4.559942E+19                                                                                                                                  | 1                | 4.559942E+19 | 39.55488 | 0.000011 |
| CPP Storage    | 1.440317E+17                                                                                                                                  | 1                | 1.440317E+17 | 0.12494  | 0.728352 |
| CR             | 1.059106E+19                                                                                                                                  | 1                | 1.059106E+19 | 9.18713  | 0.007948 |
| CPP Storage*CR | 2.388614E+18                                                                                                                                  | 1                | 2.388614E+18 | 2.07199  | 0.169304 |
| Error          | 1.844503E+19                                                                                                                                  | 16               | 1.152814E+18 |          |          |

## Post-hoc Tukey tests

| Cell No. | Tukey HSD test; variable Transfection in Cells (Fig2F)<br>Approximate Probabilities for Post Hoc Tests<br>Error: Between MS = 115E16, df = 16.000 |     |               |               |               |               |
|----------|---------------------------------------------------------------------------------------------------------------------------------------------------|-----|---------------|---------------|---------------|---------------|
|          | CPP Storage                                                                                                                                       | CR  | {1}<br>5215E5 | {2}<br>2668E6 | {3}<br>1043E6 | {4}<br>1807E6 |
| 1        | Fresh complex                                                                                                                                     | CR2 |               | 0.027950      | 0.867748      | 0.269623      |
| 2        | Fresh complex                                                                                                                                     | CR3 | 0.027950      |               | 0.118742      | 0.595264      |
| 3        | 1 week at +4°C                                                                                                                                    | CR2 | 0.867748      | 0.118742      |               | 0.679818      |
| 4        | 1 week at +4°C                                                                                                                                    | CR3 | 0.269623      | 0.595264      | 0.679818      |               |

Fig2G

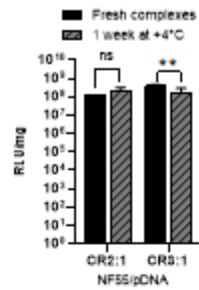

2-way ANOVA

| Effect         | Univariate Tests of Significance for Transfection in Cells (Fig2G)<br>Sigma-restricted parameterization<br>Effective hypothesis decomposition |                  |              |          |          |
|----------------|-----------------------------------------------------------------------------------------------------------------------------------------------|------------------|--------------|----------|----------|
|                | SS                                                                                                                                            | Degr. of Freedom | MS           | F        | p        |
| Intercept      | 1.011827E+18                                                                                                                                  | 1                | 1.011827E+18 | 89.17609 | 0.000000 |
| CPP Storage    | 4.218565E+16                                                                                                                                  | 1                | 4.218565E+16 | 3.71798  | 0.071769 |
| CR             | 7.786244E+16                                                                                                                                  | 1                | 7.786244E+16 | 6.86231  | 0.018585 |
| CPP Storage*CR | 1.627730E+17                                                                                                                                  | 1                | 1.627730E+17 | 14.34580 | 0.001614 |
| Error          | 1.815422E+17                                                                                                                                  | 16               | 1.134639E+16 |          |          |

Post-hoc Tukey tests

| Cell No. | Tukey HSD test; variable Transfection in Cells (Fig2G)<br>Approximate Probabilities for Post Hoc Tests<br>Error: Between MS = 113E14, df = 16.000 |     |               |               |               |               |
|----------|---------------------------------------------------------------------------------------------------------------------------------------------------|-----|---------------|---------------|---------------|---------------|
|          | CPP Storage                                                                                                                                       | CR  | {1}<br>1182E5 | {2}<br>4235E5 | {3}<br>2068E5 | {4}<br>1512E5 |
| 1        | Fresh complex                                                                                                                                     | CR2 |               | 0.001873      | 0.567318      | 0.960513      |
| 2        | Fresh complex                                                                                                                                     | CR3 | 0.001873      |               | 0.025087      | 0.004827      |
| 3        | 1 week at +4°C                                                                                                                                    | CR2 | 0.567318      | 0.025087      |               | 0.841493      |
| 4        | 1 week at +4°C                                                                                                                                    | CR3 | 0.960513      | 0.004827      | 0.841493      |               |

Fig4B

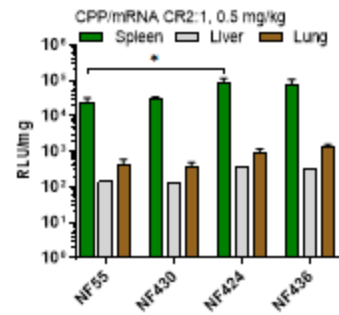

2-way ANOVA

| Effect     | Univariate Tests of Significance for Expression (Fig4B)<br>Sigma-restricted parameterization<br>Effective hypothesis decomposition |                  |              |          |          |
|------------|------------------------------------------------------------------------------------------------------------------------------------|------------------|--------------|----------|----------|
|            | SS                                                                                                                                 | Degr. of Freedom | MS           | F        | p        |
| Intercept  | 2.422164E+10                                                                                                                       | 1                | 2.422164E+10 | 22.46248 | 0.000014 |
| CPP        | 6.802097E+09                                                                                                                       | 3                | 2.267366E+09 | 2.10269  | 0.109334 |
| Tissue     | 4.585485E+10                                                                                                                       | 2                | 2.292743E+10 | 21.26226 | 0.000000 |
| CPP*Tissue | 1.303258E+10                                                                                                                       | 6                | 2.172097E+09 | 2.01434  | 0.077635 |
| Error      | 6.469893E+10                                                                                                                       | 60               | 1.078316E+09 |          |          |

# Post-hoc Tukey tests

| Tukey HSD test; variable Expression (Fig4B)<br>Approximate Probabilities for Post Hoc Tests<br>Error: Between MS = 1078E6, df = 60.000 |       |        |        |        |        |        |        |        |        |        |        |        |        |        |
|----------------------------------------------------------------------------------------------------------------------------------------|-------|--------|--------|--------|--------|--------|--------|--------|--------|--------|--------|--------|--------|--------|
| Cell No.                                                                                                                               | CPP   | Tissue | {1}    | {2}    | {3}    | {4}    | {5}    | {6}    | {7}    | {8}    | {9}    | {10}   | {11}   | {12}   |
|                                                                                                                                        |       |        | 147.37 | 24922. | 442.24 | 127.63 | 31677. | 397.00 | 394.06 | 91564. | 968.67 | 323.33 | 74608. | 1301.0 |
| 1                                                                                                                                      | NF55  | Liver  |        | 0.975  | 1.000  | 1.000  | 0.938  | 1.000  | 1.000  | 0.000  | 1.000  | 1.000  | 0.011  | 1.000  |
| 2                                                                                                                                      | NF55  | Spleen | 0.975  |        | 0.977  | 0.989  | 1.000  | 0.990  | 0.962  | 0.018  | 0.968  | 0.976  | 0.292  | 0.983  |
| 3                                                                                                                                      | NF55  | Lung   | 1.000  | 0.977  |        | 1.000  | 0.942  | 1.000  | 1.000  | 0.000  | 1.000  | 1.000  | 0.012  | 1.000  |
| 4                                                                                                                                      | NF430 | Liver  | 1.000  | 0.989  | 1.000  |        | 0.967  | 1.000  | 1.000  | 0.002  | 1.000  | 1.000  | 0.037  | 1.000  |
| 5                                                                                                                                      | NF430 | Spleen | 0.938  | 1.000  | 0.942  | 0.967  |        | 0.969  | 0.918  | 0.141  | 0.927  | 0.941  | 0.675  | 0.952  |
| 6                                                                                                                                      | NF430 | Lung   | 1.000  | 0.990  | 1.000  | 1.000  | 0.969  |        | 1.000  | 0.002  | 1.000  | 1.000  | 0.038  | 1.000  |
| 7                                                                                                                                      | NF424 | Liver  | 1.000  | 0.962  | 1.000  | 1.000  | 0.918  | 1.000  |        | 0.000  | 1.000  | 1.000  | 0.005  | 1.000  |
| 8                                                                                                                                      | NF424 | Spleen | 0.000  | 0.018  | 0.000  | 0.002  | 0.141  | 0.002  | 0.000  |        | 0.000  | 0.000  | 0.998  | 0.000  |
| 9                                                                                                                                      | NF424 | Lung   | 1.000  | 0.968  | 1.000  | 1.000  | 0.927  | 1.000  | 1.000  | 0.000  |        | 1.000  | 0.006  | 1.000  |
| 10                                                                                                                                     | NF436 | Liver  | 1.000  | 0.976  | 1.000  | 1.000  | 0.941  | 1.000  | 1.000  | 0.000  | 1.000  |        | 0.011  | 1.000  |
| 11                                                                                                                                     | NF436 | Spleen | 0.011  | 0.292  | 0.012  | 0.037  | 0.675  | 0.038  | 0.005  | 0.998  | 0.006  | 0.011  |        | 0.013  |
| 12                                                                                                                                     | NF436 | Lung   | 1.000  | 0.983  | 1.000  | 1.000  | 0.952  | 1.000  | 1.000  | 0.000  | 1.000  | 1.000  | 0.013  |        |
